# Supplementary material for: Novel FeVO4 catalyst modified with NbTiOx for efficient selective catalytic reduction of NOx with NH3
Source: Royal Society of Chemistry journal article supplement (doi:10.1039/d4cy00676c), 2024-01-01
Supplement: d4cy00676c1.pdf [file d4cy00676c1.pdf]

## Electronic Supplementary Information

### Novel FeVO<sub>4</sub> catalyst modified with NbTiO<sub>x</sub> for efficient selective catalytic reduction of NO<sub>x</sub> with NH<sub>3</sub>

Xin Shen<sup>a,b</sup>, Zhihua Lian<sup>a,c,\*</sup>, Jiaxin Sheng<sup>a</sup>, Chunxi Lin<sup>a</sup>, Hui Zhang<sup>a</sup>, Wenpo Shan<sup>a,c</sup>  
and Hong He<sup>a,c,d</sup>

<sup>a</sup> Key Laboratory of Urban Pollutant Conversion, Institute of Urban Environment,  
Chinese Academy of Sciences, Xiamen 361021, China

<sup>b</sup> Collaborative Innovation Center of Chemistry for Energy Materials, College of  
Chemistry and Chemical Engineering, Xiamen University, Xiamen 361005, China

<sup>c</sup> Fujian Key Laboratory of Atmospheric Ozone Pollution Prevention, Institute of Urban  
Environment, Chinese Academy of Sciences, Xiamen 361021, China

<sup>d</sup> State Key Joint Laboratory of Environment Simulation and Pollution Control,  
Research Center for Eco-Environmental Sciences, Chinese Academy of Sciences,  
Beijing 100085, China

\*Corresponding Authors:

E-mail: zhlian@iue.ac.cn (Z. Lian)

## Catalyst characterizations

The relative content of each element in the samples was analyzed using an X-ray fluorescence (XRF) analysis PANalytical Axios-MAX spectrometer. Powder X-ray diffraction (XRD) patterns were measured on a PANalytical X'Pert Pro diffractometer with Cu K $\alpha$  radiation operating at 40 kV and 40 mA. The data for  $2\theta$  ranging from  $10^\circ$  to  $90^\circ$  were collected with the step size of  $0.02^\circ$ .

The specific area of catalysts was measured by N<sub>2</sub> adsorption–desorption analysis using Quantachrome Autosorb iQ2 instrument cooled by liquid N<sub>2</sub> at  $-196^\circ\text{C}$ . Prior to the N<sub>2</sub> physisorption, the samples were degassed under vacuum at  $300^\circ\text{C}$  for 1 h for analysis. The surface area was determined using the BET model, while the pore structure was determined using the Barrett-Joyner-Halenda (BJH) method.

The surface morphology of catalysts was measured by transmission electron microscopy (TEM, FEI Tecnai G2 F20).

Hydrogen temperature-programmed reduction (H<sub>2</sub>-TPR) analysis was performed using the Auto Chem II instrument by Micromeritics. The samples (100 mg) underwent pretreatment at  $300^\circ\text{C}$  in a quartz reactor under 50% Ar/He (60 mL/min) for 0.5 h and cooled down to room temperature, followed by 10% H<sub>2</sub>/Ar (50 mL/min) purging for 1 h. The H<sub>2</sub>-TPR was performed from room temperature to  $1000^\circ\text{C}$  in 10% H<sub>2</sub>/Ar gas flow at a rate of 50 mL/min and a heating rate of  $10^\circ\text{C}\cdot\text{min}^{-1}$ .

The X-ray Photoelectron Spectroscopy (XPS) was tested on an ESCALAB 250 XI (ThermoFisher Scientific) using Al K $\alpha$  radiation (1486.6 eV). To ensure accurate measurements, a calibration is performed using the C1s peak (BE=284.8 eV) as standard. The full spectrum pass energy is 100 eV, and the high-resolution spectrum pass energy is 20 eV.

The temperature programmed desorption of  $\text{NH}_3$  ( $\text{NH}_3$ -TPD) were carried out using a fixed-bed quartz flow reactor and a Fourier transform infrared gas analyzer. Prior to the TPD experiments, the samples weighing 300 mg were subjected to pretreatment at  $400^\circ\text{C}$  in a flow of 20%  $\text{O}_2/\text{N}_2$  (300 mL/min) for 30 min, followed by cooling to room temperature. Then the catalysts were treated with 300 mL/min 20%  $\text{NH}_3/\text{N}_2$  at  $30^\circ\text{C}$  for 1 h, and the physical adsorption was flushed by  $\text{N}_2$  purge at room temperature. The temperature was then gradually raised from room temperature to  $650^\circ\text{C}$  at a rate of  $2^\circ\text{C}\cdot\text{min}^{-1}$ .

*In situ* Diffuse reflectance infrared Fourier transform spectroscopic (*in situ* DRIFTS) experiments were recorded on a Thermo Fisher FTIR spectrometer (Vertex 80V) equipped with an MCT detector. Before every measurement, all catalysts were pretreated in 20%  $\text{O}_2/\text{N}_2$  with a total flow rate of 300 mL/min at  $450^\circ\text{C}$  for 30 min, and subsequently cooled down to  $200^\circ\text{C}$ . Then the background spectra were collected under a flowing  $\text{N}_2$  atmosphere. DRIFTS experiments of  $\text{NH}_3$  or  $\text{NO} + \text{O}_2$  adsorption were conducted by exposing catalysts to  $\text{NH}_3$  or  $\text{NO} + \text{O}_2$  at  $200^\circ\text{C}$  until the absorbed bands became stable and then were purged under  $\text{N}_2$  for 1 h at a flow rate of 300 mL/min. For the sample pre-adsorbed with  $\text{NH}_3$  at  $200^\circ\text{C}$ ,  $\text{NO} + \text{O}_2$  was added. For the sample pre-adsorbed with  $\text{NO} + \text{O}_2$  at  $200^\circ\text{C}$ ,  $\text{NH}_3$  was added. *In situ* DRIFTS spectra of the reaction were recorded respectively.

In order to collect DRIFTS spectra of  $\text{NH}_3$  adsorption on different catalysts at different temperatures, the samples were cooled down to  $150^\circ\text{C}$ ,  $250^\circ\text{C}$  and  $350^\circ\text{C}$  after pretreating, and the background spectra were collected under a flowing  $\text{N}_2$  atmosphere respectively. Then the DRIFTS experiments of  $\text{NH}_3$  adsorption were conducted by exposing catalysts to  $\text{NH}_3$  at  $150^\circ\text{C}$ ,  $250^\circ\text{C}$  and  $350^\circ\text{C}$  respectively until the absorbed bands became stable and then were purged under  $\text{N}_2$  for 1 h at a flow rate of 300

mL/min. All spectra were recorded by accumulating 64 scans with a resolution of 4  $\text{cm}^{-1}$ .

## Results and discussion

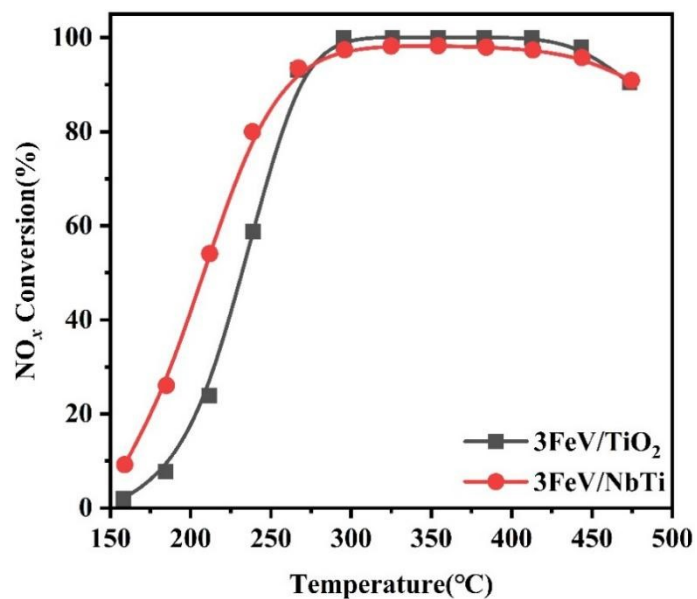

**Fig. S1.** NH<sub>3</sub>-SCR activity of 3FeV/NbTi and 3FeV/TiO<sub>2</sub>. Reaction conditions: [NH<sub>3</sub>] = [NO] = 500 ppm, [H<sub>2</sub>O] = 5 vol.%, [O<sub>2</sub>] = 5 vol.%, N<sub>2</sub> balance, and GHSV=100,000 h<sup>-1</sup>.

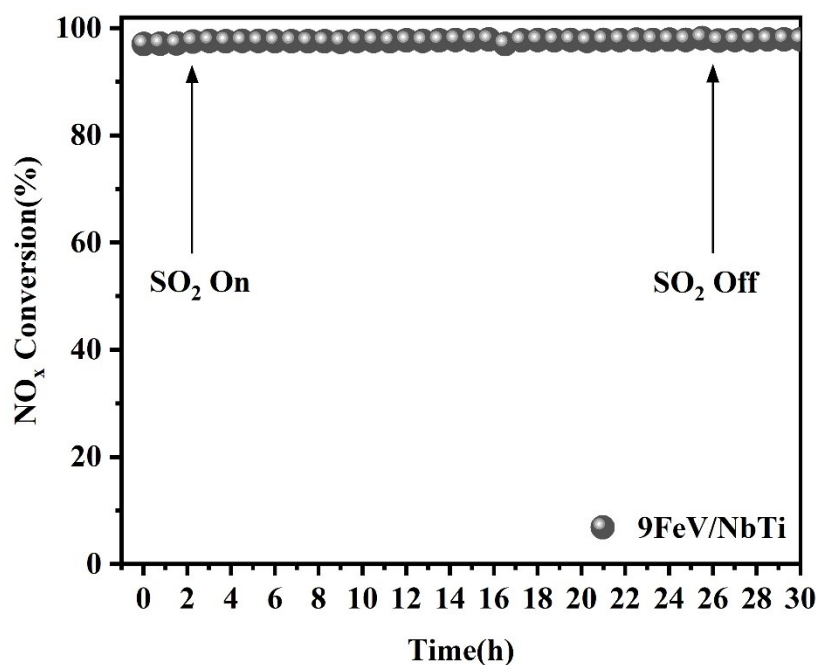

**Fig. S2.** Sulfur resistance of 9FeV/NbTi catalyst at 250°C. Reaction conditions: [NH<sub>3</sub>] = [NO] = 500 ppm, [SO<sub>2</sub>] = 300 ppm, [O<sub>2</sub>] = 5 vol.%, N<sub>2</sub> balance, and GHSV=100,000 h<sup>-1</sup>.

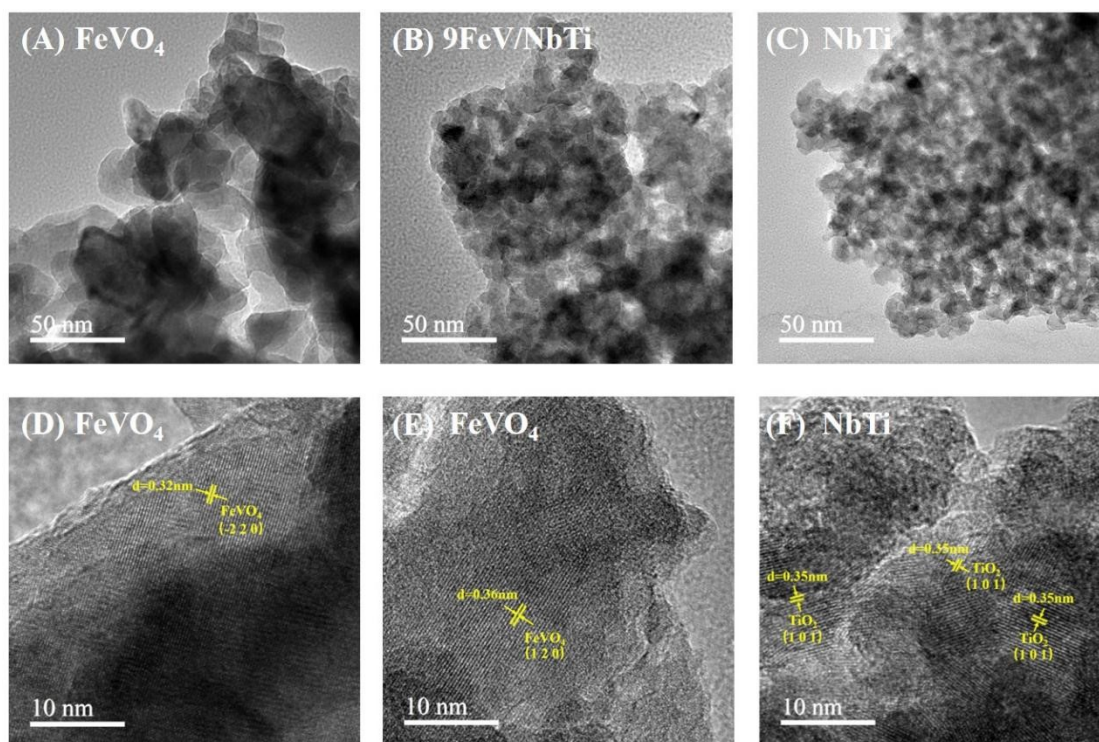

**Fig. S3** The HR-TEM diagrams of  $\text{FeVO}_4$ , NbTi composite oxide and 9FeV/NbTi catalysts

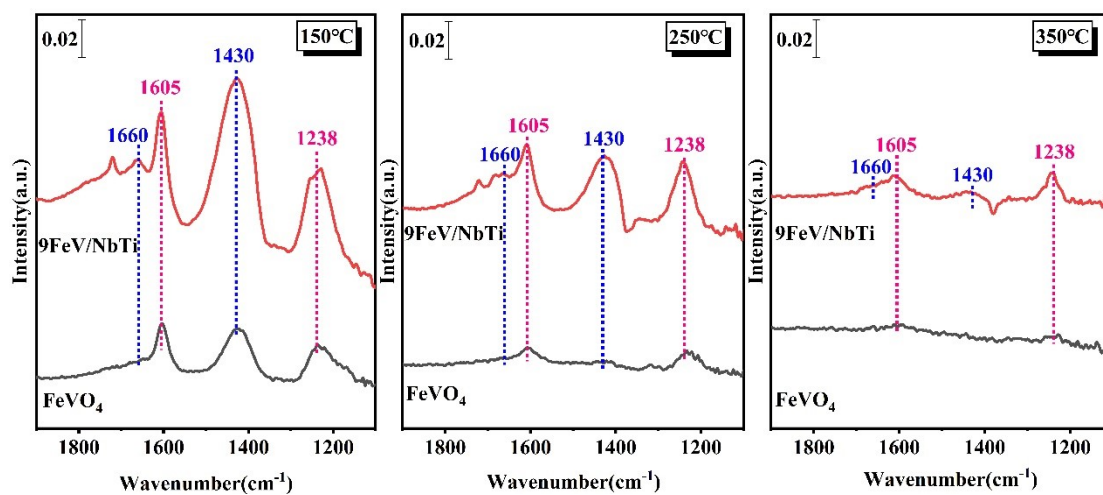

**Fig. S4.** DRIFT spectra of  $\text{NH}_3$  adsorption on  $\text{FeVO}_4$ , 9FeV/NbTi catalysts at 150°C, 250°C and 350°C.

**Table S1.** The proportion of different elements in the as-prepared catalysts <sup>a</sup>

| Samples           | Fe/V ratio | Nb/Ti ratio | m(Fe <sub>2</sub> O <sub>3</sub> +V <sub>2</sub> O <sub>5</sub> )/m(Nb <sub>2</sub> O <sub>5</sub> +TiO <sub>2</sub> ) (%) |
|-------------------|------------|-------------|----------------------------------------------------------------------------------------------------------------------------|
| FeVO <sub>4</sub> | 1.14       | —           | —                                                                                                                          |
| 15FeV/NbTi        | 1.17       | 0.29        | 14.93%                                                                                                                     |
| 9FeV/NbTi         | 1.03       | 0.25        | 10.55%                                                                                                                     |
| 6FeV/NbTi         | 0.97       | 0.22        | 7.04%                                                                                                                      |
| NbTi              | —          | 0.30        | —                                                                                                                          |

<sup>a</sup> The ratio as calculated from powder X-ray fluorescence results.

**Table S2.** The H<sub>2</sub> consumption of NbTi composite oxide and xFeV/NbTi catalysts

| Samples           | H <sub>2</sub> consumption (μmol/g) |        |       |
|-------------------|-------------------------------------|--------|-------|
|                   | <602°C                              | >602°C | Total |
| FeVO <sub>4</sub> | 1734                                | —      | 1734  |
| 15FeV/NbTi        | 159                                 | 236    | 395   |
| 9FeV/NbTi         | 136                                 | 203    | 339   |
| 6FeV/NbTi         | 95                                  | 164    | 259   |
| NbTi              | —                                   | 229    | 229   |
